# Supplementary material for: A Framework for the Establishment of a Cnidarian Gene Regulatory Network for “Endomesoderm” Specification: The Inputs of ß-Catenin/TCF Signaling
Source: PLOS journal article supplement (doi:10.1371/journal.pgen.1003164), 2012-12-27

Supplementary Figure 3

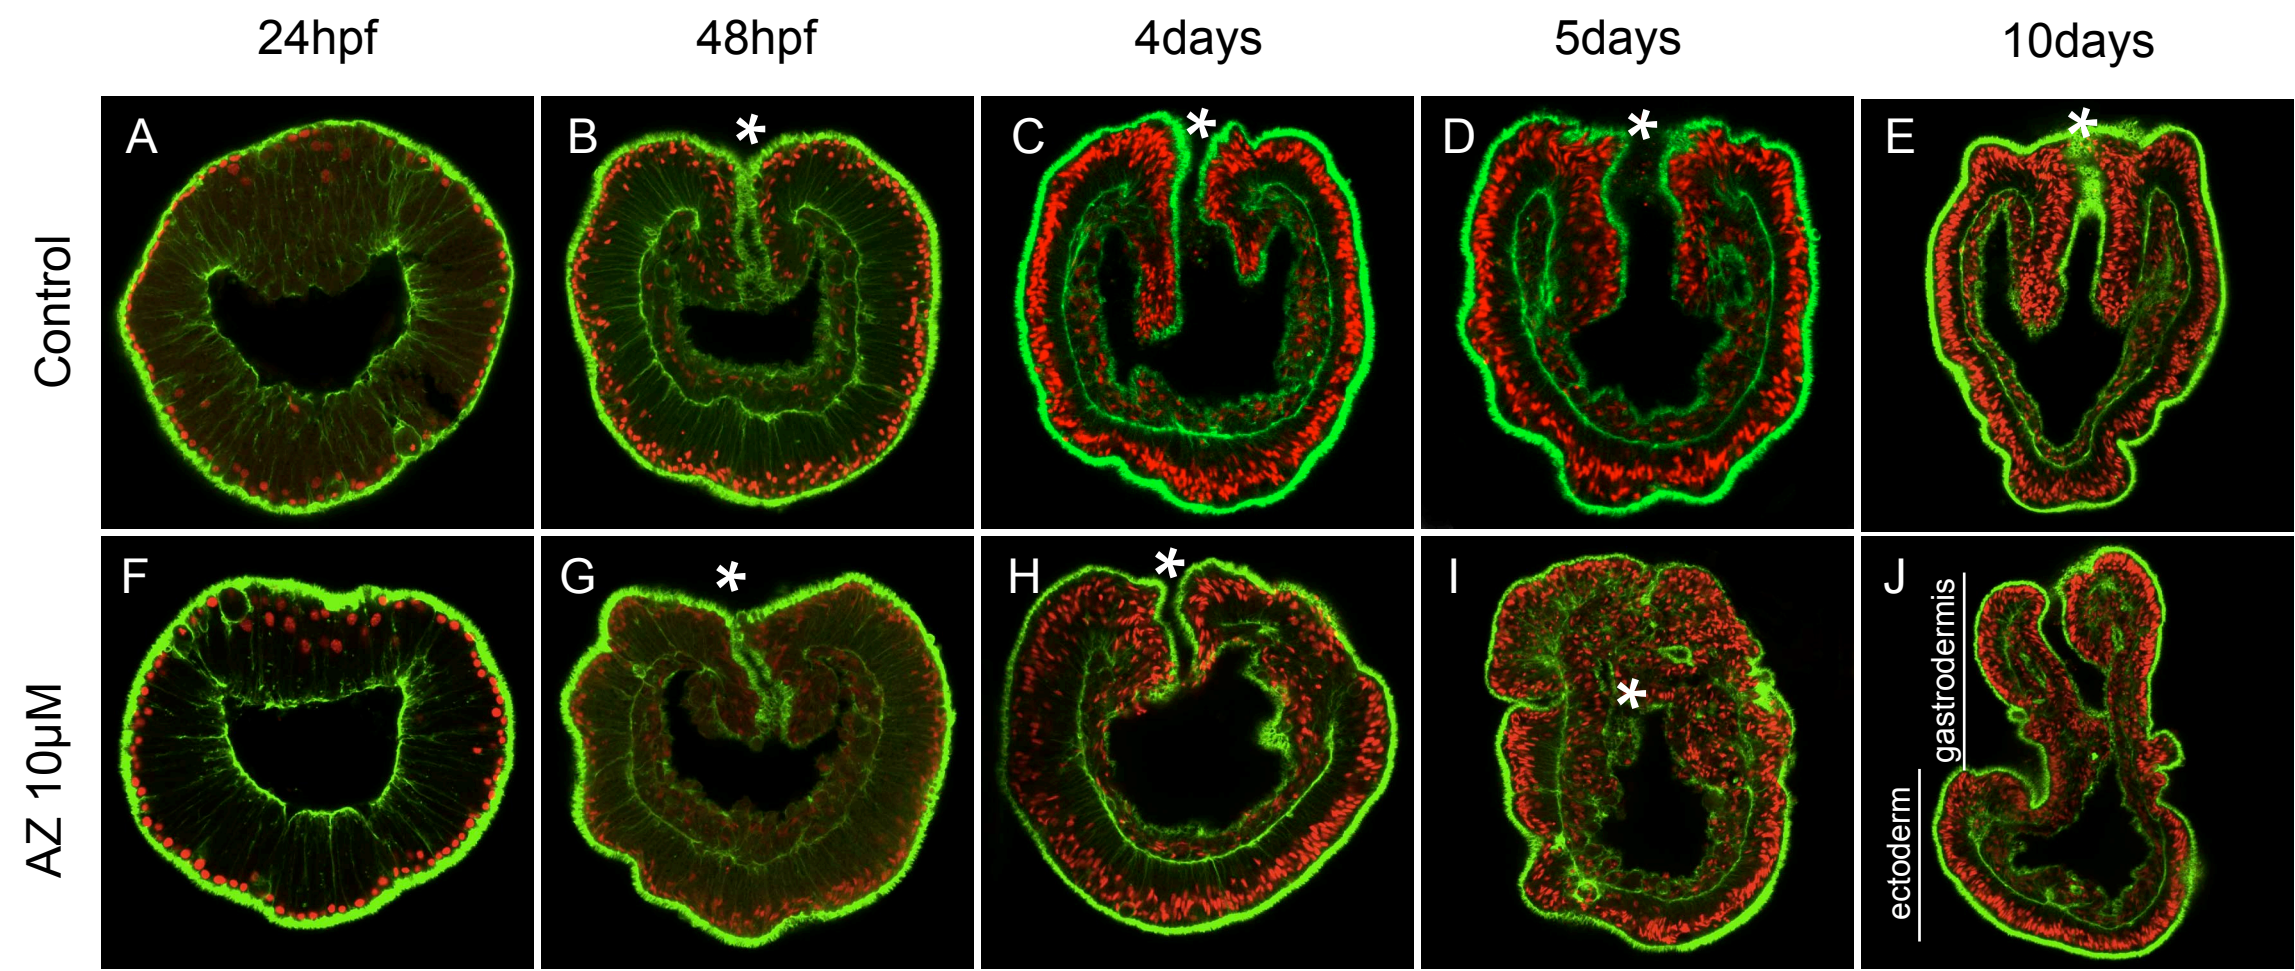

Supplement: S3 (10.1371/journal.pgen.1003164.s003) [file journal.pgen.1003164.s003]
