# Supplementary material for: A Framework for the Establishment of a Cnidarian Gene Regulatory Network for “Endomesoderm” Specification: The Inputs of ß-Catenin/TCF Signaling
Source: PLoS Genet. 2012 Dec 27;8(12):e1003164. doi: 10.1371/journal.pgen.1003164 (PMC3531958; doi:10.1371/journal.pgen.1003164)
Supplement: Table S4 — Primer pairs used in this study for qPCR analysis. (XLS) [file pgen.1003164.s012.xls]

## Sheet: Sheet1
gene	efficiency	FWD (5'-3')		REV (5'-3')
actin_new	2.11	GGACAGGTCATCACCATTGGCAAC		CGGATTCCATACCCAGAAAGGAGG
gadph	1.92	GGACCAAGTGCCAAGAACTG		GGAATGCCATACCCGTCAG
activin	1.87	TTGAGAAACCTTGCCTTCCTCCG		GCTGAGTATCCCGACACCTCTAATGG
admp	1.83	GAAAATTGGTGGCGTTGGATGTCC		ATGAGCGAACAGACACCCATAGGC
ashA/pn5	1.98	TGTAGTAGCGAGAAGAAATGCCAG		TTGCACTGCGAAGTGTCTTAAC
axin-like	2.05	CAAAGCCAGCAAACACAGCCAGAC		TCTTCACCCATTTCCATCCACTGC
bicaudalC-like	1.93	CAAACAGCAAGACGCCAAGCAATC		TGGGAGGAGTTGTCATCCGAGTAGG
bmp2/4	1.84	AGACAACGATGGGATTGACG		TCTGCGGAGGTCACTGTCTC
bra	2.04	TCGCATTCTTTTCCCGAGACTCAG		TCCAGAGCCTCCTTTTGTTCCTGC
chordin	1.83	ATCCCAACAACGCACGCTGGAC		GAACACGACGACCTGCCATTCTG
duxABC-like	2.02	GAACAAACTGTCATCCTAGAGGGGGC		CAAACCTGGATTCTCGACTCGTCG
elkA-like	1.87	CAACGACAAAAAGCAGCACGAACG		CGCATATTGAGGTCTTGCCCCTTG
evx	1.92	TCAAAGCGGCATCTTCCCTCTGTC		CCATGCGACCACATTGGTGTGTTC
fgf1A	1.99	ACAACTGGGCTCATTCACAAACCG		CAGAAAATCGTGCAGCGAACGTTG
fgf8/17-like	1.96	TCCTAGAGTCGGACACTTTTGGC		CACACACTTGGGGCTCTTTGGAATC
fgf8A	1.98	GCCTTTTGAGAGAGTAACCCAGC		GCGACCAAATCCATCTGACTC
nfix-like	1.83	ATGCTTATCCACTCGGACACACGG		ACCACACTCAAGGCACTTATGCGG
follistatin-like	1.87	ACACGACTCAAACCTTCGACCCAG		CATGCTATACCTGGATTTTGCCGC
foxA	2.06	ACAGAGCCCAAACAAGATGC		GCCTGTAGTAGGGAAACAAGTCC
foxA/B-like	1.86	AGTCAAGCCGCCGTTTTCTTACATC		GGAGTTTTGCCACTTTTGCTGGTTC
foxB	2.02	TAACACGCAACGCTGGCAGAACTC		TCAGGACGACGAGGAATCTTCACG
foxQ1	1.9	TTACGAGATCCAGCGAGACCTTGG		TCCGTCTTCTCCTGAAGGAACCATC
foxQ2-like	1.97	CGCTACAAGATGAAGCACAGCATCG		AGGACGTTGAAGGCTTTCGTTGC
gata	2.12	TCATCCAGCGACAGAATGC		GGCGGTAGAAGTTGTGTAGGTTC
gli	1.96	GTGGGTGGTGATGAAATACCTGGG		CTTGGCTGTCAAACACAATGGTGC
gsc	1.98	CCAAAAAGGCAAATGAGGAGGACC		TGACTCGCACATCTCGGGATTCTC
hd007	2.12	CATTTACGGATGCGGAAGACCTTG		TTGCCAATGGAGTGAGAGGTTTCC
hd017	2.12	TTTCATCCCGACGTGGTAGCTCAG		CGTGCGTTTGTTGTGGAACCAACTC
hd032	2.07	CCAAATCTCATCACACGCCAAGACC		AAATCGGACTCGGTTGACAGAGGAG
hd043	1.84	CCTCACTTCAATCAAGCACCGCAC		CGCAAGGTTCCACAAAGGCTAAGC
hd050	2.04	ACATGATGGCACGCTCACTACAGC		TCCCTCTTCCATTTGGTTCGTCGG
hd071	1.98	ATCTCATCACACGCCAAGACCTGG		TGGACAAAGACGAGTTGCTGCTGG
hd147	1.94	GAACTCGACAAGTCCAAGGCTTTCG		AGCGGAAAACGAGGAACGGTTC
hes3	2.1	AAAACCCTGCGACTTTCACCCC		TCGAGTTCTGCGTTGCCTCTCTG
hlxB9	1.83	CCACCAGTTGTTGGCACTCGAAAG		TCTCGGTGAGCATCAAGGAGGTTG
lhx1	2.04	TTACGGGTTGGACGAGGATTTGG		TGTTTCTGGACGGCTTAGGAGTTGC
lmx	1.82	AATACAATGCCGACCGAAAGGGAC		AACCGAAGAATCGTCCGAGTCAGAG
moxC	2.06	TTTCCCCATTGCCTTTCGCAGC		CCATCTCGTTATCCCCATTTTCGG
moxD	2.1	CGGTTCCTCCACTTCATCACAACC		ACGTGTCGGATCATTGGGATGC
nanos2	1.81	TGTTCAACGACTACTTCGGGCTCAG		ATGCTGTCAAATCGGTCACGACGG
nk-like13	1.93	AGGAGAAAGCTCTTCACCGATACGC		CGCTTGTTCTGGAACCACGTCTTG
nk2-like	1.95	AAGCAAGACGGTCCAACAGACTCG		TGGATGATGGGAAGATAGTCGAGCG
nk2A-like	2.1	AACAGATTGGAGGCTTGTGGCGTG		TTGTCGTCATTGGACTCAGCGTCG
nkd1-like	1.97	GAGAACATTCCCGACAAACGCAAG		GGCAGTTGATTCCATTGGTAGGACC
otxA	1.98	AAACAGCGTCGAGAGCGAACAACC		GCGAGTCTTGGCGAAAAGTTCTTCC
otxB	2.02	CCACGGATTACATCTTCTCTCG		TCTTGCTTGCCTACTTGACAGC
otxC	2.15	GCCCACTGCGACTTTTCTATGCTTC		GCTCGTTCTTGCTCGGTATCGAATC
phtf1-like	1.86	TGGGATCGACATTCCACAAAGCC		GAGGTCTGCTGTTTCCACCATTGATG
pl10	1.84	TCGTCGCATTGTGGACCAAGACTC		CCAACTTTGCCAACAGCCAAGAAG
porcupine-like	183	GCTGACTGGCATAGGAGCGATGAC		CCCAACCAAGCACATAACCAAAGG
repo	1.84	GGTTTGGTTCCAGAATCGTCGTGC		AAAAGGAATGTGCAGGCGAGGCTG
smad1/5	2.09	GACCCCAATACAACCAACTCCGAAC		AAGACACTCTGCGTAAACTTCCCCG
smad4	1.89	CGACACAACGGAGACAAGAAAGGC		AGCTTGCGGGGTGGAAATATAAGG
smad4-like	1.81	CGTTTCACTATGAGCGGGTCGTG		GGTTCACTCTGGCTACTTGTGCTTCC
snailA	2.11	CGAAGCACCTGCCAAACTC		CAGTGGAAAGGTCGCTTGTG
snailB	1.95	AGTTGTAACGAGCGAAGCACCTGC		TGTTGTGTAGGGGGACAGTAGAAGTATTGG
sprouty	1.88	TGGACAAGACTGTGGGCGATTCTC		GGGGCGTTTTGACCTGTTTTCG
strabismus	1.85	GCGAAATCGGTGACGAGAAGAAAGG		AAGCAATGAGGCTGATGATAGCGG
tbx15-like	1.81	AATAGTCATCCGTGCCTTCCTGCTC		GTGGTATGCCATTGTAGCCTTCCG
tbx20-like	1.84	CACAGGTATTCCTACACAGACTCGG		TTCCTCTCCACTAAAAGGTGACTCC
tcf	1.8	TGAGATGGCAAGAAAAGAACGGGC		GCACGACATTTTTTGGGGTTGGTG
tolloid	1.93	ATCTAACGGTAACGGGACCATCACC		TTCTCCACAGGCATCGCTTGTTC
twist-1	1.93	CAGACTTTACGCTTGGCTTCACGC		GCTCGGGTGCTTCTCGTTATTTCC
unc4	2.04	TCTGGTTCGCAATACGATCCGTG		TTGATGTAGGGGTGGAGGGAATGG
vasa-like	1.85	ATAAAGCGAATGGGTGGTGGCG		CTGTCTTGATTTGGGCACTCTCTCG
vasa1	1.88	CGTGATTACAGTGAATGGCAGCGAG		TCAACGAAGACAAGAGTGCGGTCG
vasa2	1.82	CAGTTGTGTGCTATGGGGGTGTTTC		AATCAGTCAAGCGTCCTGGAGTGC
wnt1	1.96	GCACCAGTTCCGAAACCGAAAATG		CGCTTGAGAATCTTGCCAAACACG
wnt11	2.01	GGTCGCCTAACTACTGCCACAAAAAC		GTCCTCGCCCACAACAAAGATACG
wnt16	1.87	GAAACTTCGTATCCCATCCTCGTCG		AGCACAGTAAATCACACCCGTCCAC
wnt2	1.99	GCTAAGGCTTTCGTGGACTCC		TGACAACCCTACGCCCAAC
wnt3	1.72	TGTGGTTCAGCAAACAGTTCACGG		CTTCTAATGCCTTTCTCCCTGCCC
wnt8	1.81	CGGTCATCCATTTGCACAACAACG		TCCAGCAGCTTTTGCTCGAACATC
wntA	1.77	GCCTTCGTGTTTGCTCTCACATCAG		TTCCCAACTCGCCTCGTCTTTAGTC
